# Supplementary material
Source: PubMed Central journal article supplement (PMC10991367)
Supplement: 262_2022_3258_MOESM2_ESM.pdf [file 262_2022_3258_MOESM2_ESM.pdf]

**Supplementary Table 1. Peripheral blood collection of the 45 patients analyzed in the study.**

| Patient ID | Peripheral blood collected |    |     |
|------------|----------------------------|----|-----|
|            | D0                         | D7 | D14 |
| #02        | √                          | √  |     |
| #03        | √                          | √  | √   |
| #04        | √                          | √  | √   |
| #05        | √                          |    | √   |
| #06        | √                          | √  | √   |
| #07        | √                          | √  | √   |
| #08        | √                          | √  | √   |
| #09        | √                          |    | √   |
| #10        | √                          | √  | √   |
| #12        | √                          | √  | √   |
| #13        | √                          | √  | √   |
| #14        | √                          |    | √   |
| #15        | √                          | √  |     |
| #16        | √                          | √  |     |
| #17        | √                          | √  | √   |
| #18        | √                          | √  | √   |
| #19        | √                          | √  |     |
| #20        | √                          | √  | √   |
| #21        | √                          | √  | √   |
| #22        | √                          |    | √   |
| #23        | √                          |    |     |
| #24        | √                          | √  | √   |
| #25        | √                          | √  |     |
| #28        | √                          | √  |     |
| #29        | √                          | √  | √   |
| #30        | √                          | √  | √   |
| #32        | √                          |    |     |
| #33        | √                          | √  | √   |

|     |   |   |   |
|-----|---|---|---|
| #34 | √ |   | √ |
| #35 | √ | √ | √ |
| #36 | √ | √ | √ |
| #37 | √ | √ | √ |
| #38 | √ | √ | √ |
| #39 | √ | √ | √ |
| #40 | √ | √ |   |
| #41 | √ | √ | √ |
| #42 | √ | √ | √ |
| #44 | √ | √ |   |
| #45 | √ | √ | √ |
| #46 | √ | √ |   |
| #47 | √ | √ |   |
| #48 | √ | √ | √ |
| #50 | √ | √ | √ |
| #51 | √ | √ | √ |
| #52 | √ | √ | √ |

---

**Supplementary Table 2. List of fluorochrome-conjugated antibodies used for flow cytometry analysis.**

| Antibody                              | Clone      | Manufacturer   | Catalog    |
|---------------------------------------|------------|----------------|------------|
| BV421 Mouse Anti-Human CD274          | MIH1       | BD Biosciences | 563738     |
| BV421 Mouse Anti-Human CD25           | M-A251     | BD Biosciences | 562442     |
| BV421 Mouse IgG1, k Isotype Control   | X40        | BD Biosciences | 562438     |
| BV510 Mouse Anti-Human CD3            | UCHT1      | BD Biosciences | 563109     |
| BV510 Mouse Anti-Human CD11c          | B-ly6      | BD Biosciences | 563026     |
| BV605 Mouse Anti-Human CD16           | 3G8        | BD Biosciences | 563172     |
| BV650 Mouse Anti-Human CD3            | UCHT1      | BD Biosciences | 563852     |
| BV711 Mouse Anti-Human CD15           | W6D3       | BD Biosciences | 563142     |
| BV786 Mouse Anti-Human CD56           | NCAM16.2   | BD Biosciences | 564058     |
| BV786 Mouse Anti-Human CD4            | SK3        | BD Biosciences | 563877     |
| BB515 Mouse Anti-Human CD11b          | ICRF44     | BD Biosciences | 564518     |
| PE-CF594 Mouse Anti-Human CD14        | MφP9       | BD Biosciences | 562335     |
| PE-CF594 Mouse Anti-Human CD19        | HIB19      | BD Biosciences | 562294     |
| PE-Cy™7 Mouse Anti-Human CD14         | M5E2       | BD Biosciences | 560919     |
| PE-Cy™7 Mouse Anti-Human CD8          | RPA-T8     | BD Biosciences | 557746     |
| FITC Mouse Anti-Human FOXP3           | PCH101     | eBioscience    | 11-4776-42 |
| APC Mouse Anti-Human CD155            | 2H7CD155   | eBioscience    | 17-1550-42 |
| APC Mouse IgG1, k Isotype Control     | P3.6.2.8.1 | eBioscience    | 17-4714-82 |
| Alexa Fluor 700 Mouse Anti-Human CD45 | 30-F11     | BioLegend      | 56-0451-82 |
| APC/Cy7 Mouse Anti-Human HLA-DR       | L243       | BioLegend      | 307618     |
| APC/Cy7 Mouse Anti-Human CD127        | A019D5     | BioLegend      | 351348     |
| PE Mouse Anti-Human VISTA             | #730804    | R&D Systems    | FAB71261P  |
| PE Mouse IgG2b, k Isotype Control     | #133303    | R&D Systems    | IC0041P    |

**Supplementary Table 3. Differentially expressed genes between classical monocytes from patients with DCB and NDB at D0.**

| Gene symbol       | Fold change (log2) | Adjusted P-value |
|-------------------|--------------------|------------------|
| <i>BACH2</i>      | 8.15065756         | 2.61E-10         |
| <i>FBXO5</i>      | 7.503135108        | 3.58E-07         |
| <i>ARHGAP6</i>    | 6.987609842        | 8.84E-07         |
| <i>SIGLEC11</i>   | 7.61156531         | 1.02E-06         |
| <i>IL1A</i>       | 3.124589598        | 1.08E-06         |
| <i>C6orf223</i>   | 8.788592216        | 1.08E-06         |
| <i>NAT6</i>       | 7.484377497        | 1.26E-06         |
| <i>RRN3P1</i>     | 5.407492044        | 1.95E-05         |
| <i>ZNF621</i>     | 6.690656486        | 1.97E-05         |
| <i>NMT2</i>       | 5.570606621        | 2.73E-05         |
| <i>CKS2</i>       | 5.8634185          | 7.11E-05         |
| <i>TNRC6C-AS1</i> | -9.209645989       | 8.31E-05         |
| <i>SH2D2A</i>     | 8.07131159         | 0.000105         |
| <i>ITSN1</i>      | -1.656164041       | 0.000248         |
| <i>SHB</i>        | 6.924519162        | 0.000248         |
| <i>ZNF503</i>     | -1.055831703       | 0.000368         |
| <i>ZNF252P</i>    | -7.430464565       | 0.0004           |
| <i>SNHG8</i>      | 1.241449467        | 0.000951         |
| <i>SPATA7</i>     | 6.838612604        | 0.000951         |
| <i>S1PR1</i>      | 8.542160498        | 0.000951         |
| <i>NUDT16</i>     | -1.288396684       | 0.001049         |
| <i>INHBA</i>      | 8.410508637        | 0.00292          |
| <i>ZNF107</i>     | -6.757870967       | 0.004127         |
| <i>GATA3</i>      | 2.463040376        | 0.005499         |
| <i>GSG1</i>       | 7.360924544        | 0.005499         |
| <i>KIAA1524</i>   | 7.171326749        | 0.006204         |
| <i>RORA-AS1</i>   | 7.89622813         | 0.011931         |
| <i>ATG13</i>      | -1.11185432        | 0.014602         |

|                    |              |          |
|--------------------|--------------|----------|
| <i>WDR33</i>       | 1.413643828  | 0.017333 |
| <i>QPCTL</i>       | -7.354993284 | 0.021569 |
| <i>GNPDA1</i>      | -1.796720914 | 0.025291 |
| <i>SSNA1</i>       | -1.316727774 | 0.028512 |
| <i>RETN</i>        | -2.95090775  | 0.031242 |
| <i>ERCC6-PGBD3</i> | 3.87229013   | 0.033488 |
| <i>OCEL1</i>       | -2.628918966 | 0.034989 |
| <i>TAGAP</i>       | 1.326241188  | 0.034989 |
| <i>EIF4E</i>       | 1.281956521  | 0.047562 |
| <i>RNU1-13P</i>    | 4.75337987   | 0.052073 |
| <i>CDC42EP2</i>    | 2.212647047  | 0.059686 |
| <i>SGOL2</i>       | -7.399279753 | 0.061423 |
| <i>NAA10</i>       | -1.722205256 | 0.061423 |
| <i>CDC27</i>       | -1.127874194 | 0.061423 |
| <i>ZHX3</i>        | 6.916927738  | 0.061423 |
| <i>ALG12</i>       | -3.514786717 | 0.064517 |
| <i>PSPC1</i>       | 1.261510479  | 0.066442 |
| <i>PDCD4-AS1</i>   | -4.709398484 | 0.070029 |
| <i>OMA1</i>        | -2.461894842 | 0.072656 |
| <i>SERPINB10</i>   | -8.833141958 | 0.073874 |
| <i>MYEOV</i>       | 5.768652382  | 0.073874 |
| <i>SCARNA21</i>    | 7.682069801  | 0.073874 |
| <i>POP1</i>        | -6.783782866 | 0.076369 |
| <i>AUTS2</i>       | 7.971412062  | 0.088339 |
| <i>CTNNAL1</i>     | 8.082798171  | 0.088339 |

---

**Supplementary Table 4. Differentially expressed genes between classical monocytes from patients with DCB and NDB at D7.**

| <b>Gene symbol</b> | <b>Fold change (log2)</b> | <b>Adjusted P-value</b> |
|--------------------|---------------------------|-------------------------|
| <i>TEKT4P2</i>     | -7.94443                  | 9.77E-08                |
| <i>PURB</i>        | 1.353232                  | 5.55E-06                |
| <i>VAPB</i>        | -1.40737                  | 5.55E-06                |
| <i>ZFP1</i>        | -7.03048                  | 5.55E-06                |
| <i>ANKLE1</i>      | -7.59113                  | 5.55E-06                |
| <i>IFI6</i>        | 1.879211                  | 5.80E-06                |
| <i>RRAGB</i>       | -7.7515                   | 1.75E-05                |
| <i>ELP4</i>        | -7.57578                  | 2.19E-05                |
| <i>ZKSCAN2</i>     | -7.6419                   | 0.000216                |
| <i>SPIN2B</i>      | -6.55512                  | 0.000217                |
| <i>EID3</i>        | -7.64923                  | 0.000217                |
| <i>PARG</i>        | -6.47313                  | 0.000389                |
| <i>MPO</i>         | -7.58721                  | 0.003745                |
| <i>TRIM37</i>      | -4.31079                  | 0.004649                |
| <i>SPATA2L</i>     | -6.15228                  | 0.005711                |
| <i>CD274</i>       | -6.26323                  | 0.005711                |
| <i>HABP4</i>       | -7.51143                  | 0.005711                |
| <i>VPS37C</i>      | 1.318875                  | 0.006875                |
| <i>CKS1B</i>       | -6.56603                  | 0.006875                |
| <i>ST20</i>        | 1.586598                  | 0.007117                |
| <i>FGFR10P</i>     | -8.23699                  | 0.007879                |
| <i>URGCP</i>       | 2.306105                  | 0.00978                 |
| <i>FAM60A</i>      | 1.509762                  | 0.014238                |
| <i>ZNF493</i>      | -5.31755                  | 0.014248                |
| <i>USP45</i>       | -6.39167                  | 0.015798                |
| <i>YARS2</i>       | -5.6954                   | 0.020533                |
| <i>ADGRE3</i>      | -7.2468                   | 0.020865                |
| <i>NUFIP1</i>      | 3.295105                  | 0.02378                 |

|               |          |          |
|---------------|----------|----------|
| <i>IRF7</i>   | 1.431992 | 0.04139  |
| <i>TRAF5</i>  | -5.65693 | 0.049274 |
| <i>YES1</i>   | -5.50605 | 0.049884 |
| <i>NF1</i>    | 1.710487 | 0.053973 |
| <i>ZNF600</i> | -5.66345 | 0.058849 |
| <i>FUNDC1</i> | -6.02692 | 0.058963 |
| <i>MYLPF</i>  | 5.428788 | 0.089276 |
| <i>OTUD1</i>  | 1.389367 | 0.091905 |
| <i>SSRP1</i>  | -1.08648 | 0.091905 |
| <i>TPRKB</i>  | -1.39178 | 0.091905 |
| <i>THTPA</i>  | -3.05813 | 0.091905 |

---

**Supplementary Table 5. Differentially expressed genes between classical monocytes at D0 and D7 from patients with DCB.**

| <b>Gene symbol</b> | <b>Fold change (log2)</b> | <b>Adjusted P-value</b> |
|--------------------|---------------------------|-------------------------|
| <i>C2orf69</i>     | 1.145926                  | 3.77E-05                |
| <i>RNF139-AS1</i>  | -6.05895                  | 0.001619                |
| <i>NOB1</i>        | -1.23061                  | 0.001619                |
| <i>MYLPF</i>       | 7.26786                   | 0.001619                |
| <i>HS3ST3B1</i>    | 7.869662                  | 0.001619                |
| <i>SIRT5</i>       | -7.10149                  | 0.00174                 |
| <i>PARG</i>        | -6.34108                  | 0.00174                 |
| <i>ETAA1</i>       | -7.64467                  | 0.001775                |
| <i>NAA10</i>       | 1.526765                  | 0.002571                |
| <i>TBCK</i>        | -6.22489                  | 0.003057                |
| <i>PHB</i>         | 1.269697                  | 0.003057                |
| <i>SLC12A2</i>     | -7.16749                  | 0.004575                |
| <i>MRPL38</i>      | 2.018169                  | 0.004575                |
| <i>ZNF100</i>      | 2.636403                  | 0.004575                |
| <i>INF2</i>        | 6.717785                  | 0.004832                |
| <i>KCNAB1</i>      | -5.51743                  | 0.005352                |
| <i>TMOD3</i>       | 1.095295                  | 0.005352                |
| <i>HYOU1</i>       | 1.514364                  | 0.005352                |
| <i>QPCTL</i>       | 6.263355                  | 0.005352                |
| <i>KIAA1407</i>    | -7.21164                  | 0.005555                |
| <i>RPL19P12</i>    | -1.28933                  | 0.005749                |
| <i>TRIM4</i>       | 1.616328                  | 0.005749                |
| <i>APOE</i>        | 8.317975                  | 0.007185                |
| <i>KAT7</i>        | -1.97933                  | 0.009202                |
| <i>FOXRED2</i>     | -5.06981                  | 0.010305                |
| <i>ZNF589</i>      | -6.76914                  | 0.011667                |
| <i>CLPB</i>        | -6.65362                  | 0.011667                |
| <i>TAGLN</i>       | -5.10568                  | 0.011667                |



|                      |          |          |
|----------------------|----------|----------|
| <i>RNF6</i>          | 2.002706 | 0.011667 |
| <i>DOHH</i>          | 6.119344 | 0.011667 |
| <i>LRIG1</i>         | 6.32551  | 0.011667 |
| <i>OAF</i>           | -1.1813  | 0.015121 |
| <i>MDFIC</i>         | -6.85016 | 0.015898 |
| <i>C1orf216</i>      | -5.63349 | 0.017579 |
| <i>NMT2</i>          | -5.77441 | 0.02362  |
| <i>PCNXL2</i>        | -5.84957 | 0.024298 |
| <i>ZSCAN25</i>       | -7.14404 | 0.026287 |
| <i>SPATA2L</i>       | -5.61797 | 0.026287 |
| <i>YIPF1</i>         | 1.805324 | 0.027129 |
| <i>MCM4</i>          | -5.00817 | 0.02811  |
| <i>S1PR4</i>         | 1.032555 | 0.030751 |
| <i>TRIM37</i>        | -5.075   | 0.033988 |
| <i>TMEM176A</i>      | 1.151419 | 0.036107 |
| <i>TBC1D13</i>       | -6.58246 | 0.036245 |
| <i>PRSS53</i>        | -6.51025 | 0.036245 |
| <i>NEK8</i>          | -5.36297 | 0.036245 |
| <i>GRPEL2</i>        | -4.54971 | 0.036245 |
| <i>RPL32P3</i>       | -3.96554 | 0.036245 |
| <i>ZNF548</i>        | -3.71936 | 0.036245 |
| <i>OCIAD1</i>        | -1.17257 | 0.036245 |
| <i>MOB1A</i>         | 2.02873  | 0.036245 |
| <i>CH17-340M24.3</i> | 4.897154 | 0.036245 |
| <i>RPS10P7</i>       | -2.29232 | 0.036852 |
| <i>DPH7</i>          | -5.50533 | 0.036908 |
| <i>TDP2</i>          | 2.462567 | 0.037077 |
| <i>SNORA57</i>       | -6.00182 | 0.03807  |
| <i>PDCD6</i>         | -1.66562 | 0.03807  |
| <i>TMEM187</i>       | -5.3443  | 0.038492 |
| <i>RHD</i>           | -7.45609 | 0.0391   |

|                    |          |          |
|--------------------|----------|----------|
| <i>ELANE</i>       | 4.422501 | 0.044158 |
| <i>TPRKB</i>       | -1.37056 | 0.045036 |
| <i>TMEM254</i>     | -6.74721 | 0.046012 |
| <i>FKBP15</i>      | -1.12968 | 0.046012 |
| <i>MRPL48</i>      | -5.08807 | 0.046284 |
| <i>FBXL3</i>       | -3.86037 | 0.046284 |
| <i>SYNPO2</i>      | -7.56238 | 0.046423 |
| <i>CLEC6A</i>      | -6.80881 | 0.046423 |
| <i>TRAM2</i>       | -7.31566 | 0.047139 |
| <i>OMA1</i>        | -5.5448  | 0.047139 |
| <i>SPIN4</i>       | -6.33886 | 0.048267 |
| <i>PRKCQ</i>       | -6.09723 | 0.048267 |
| <i>UBQLN4</i>      | -5.90352 | 0.049893 |
| <i>UTP6</i>        | -7.51491 | 0.050804 |
| <i>GRAP2</i>       | -7.11296 | 0.050804 |
| <i>CFLAR-AS1</i>   | -6.43027 | 0.050804 |
| <i>ZBTB41</i>      | -5.59077 | 0.050804 |
| <i>SFXN3</i>       | 1.117259 | 0.050804 |
| <i>ENOX2</i>       | -6.68658 | 0.051443 |
| <i>NOMO1</i>       | 2.381557 | 0.051443 |
| <i>MID1IP1-AS1</i> | -6.58778 | 0.052125 |
| <i>RHNO1</i>       | -7.53655 | 0.052251 |
| <i>PUS1</i>        | -6.94053 | 0.052251 |
| <i>ACO1</i>        | -6.66462 | 0.052251 |
| <i>NFYC-AS1</i>    | -5.29029 | 0.052251 |
| <i>RRP9</i>        | -5.00834 | 0.052251 |
| <i>RORA-AS1</i>    | -3.44022 | 0.052251 |
| <i>KCNMB1</i>      | 3.772661 | 0.052251 |
| <i>FRA10AC1</i>    | -6.37559 | 0.052415 |
| <i>PIAS3</i>       | -7.68392 | 0.05749  |
| <i>SEC31B</i>      | -7.35077 | 0.057945 |

|                 |          |          |
|-----------------|----------|----------|
| <i>STEAP4</i>   | -7.35948 | 0.059738 |
| <i>ZNF417</i>   | 7.478864 | 0.059738 |
| <i>PP7080</i>   | -6.77838 | 0.060351 |
| <i>GNG7</i>     | -6.32965 | 0.060403 |
| <i>BOD1</i>     | -4.62678 | 0.060403 |
| <i>JUP</i>      | -3.46583 | 0.060403 |
| <i>PRMT5</i>    | -5.14416 | 0.060935 |
| <i>PIK3R4</i>   | -5.48536 | 0.062009 |
| <i>SUPT3H</i>   | -6.0978  | 0.063727 |
| <i>PANK3</i>    | -4.82541 | 0.063727 |
| <i>IKZF3</i>    | -3.29017 | 0.063899 |
| <i>NDUFA12</i>  | 1.299993 | 0.063899 |
| <i>TEP1</i>     | -7.13193 | 0.064208 |
| <i>LAS1L</i>    | -7.11231 | 0.064208 |
| <i>BRAF</i>     | -7.00333 | 0.064208 |
| <i>RNF34</i>    | -7.79305 | 0.064619 |
| <i>RFX3</i>     | -6.61299 | 0.064619 |
| <i>ZNF845</i>   | -5.10029 | 0.067361 |
| <i>NF1</i>      | 1.62795  | 0.067607 |
| <i>ENC1</i>     | 1.053379 | 0.06783  |
| <i>VIPR1</i>    | -6.86261 | 0.069152 |
| <i>TAF1L</i>    | -6.66167 | 0.069152 |
| <i>ARID1B</i>   | -1.25798 | 0.069152 |
| <i>RNASEH2A</i> | -5.6632  | 0.070402 |
| <i>SMPD2</i>    | -5.10107 | 0.070402 |
| <i>ADCY10P1</i> | -5.05582 | 0.070402 |
| <i>CTAGE7P</i>  | 4.809455 | 0.070402 |
| <i>TMEM80</i>   | -3.77164 | 0.071061 |
| <i>MEX3C</i>    | -6.9542  | 0.072567 |
| <i>SNAPC4</i>   | -6.3136  | 0.072567 |
| <i>APLF</i>     | -8.45212 | 0.075481 |

|                 |          |          |
|-----------------|----------|----------|
| <i>ABTB1</i>    | -1.45808 | 0.076786 |
| <i>RAP1GDS1</i> | -5.81029 | 0.076897 |
| <i>CASD1</i>    | -4.93791 | 0.077366 |
| <i>CX3CR1</i>   | -7.64904 | 0.077451 |
| <i>ACSF3</i>    | -5.99007 | 0.077451 |
| <i>BMS1P6</i>   | -5.25404 | 0.077451 |
| <i>PIPSL</i>    | -3.89394 | 0.077451 |
| <i>DHX8</i>     | 1.543303 | 0.077588 |
| <i>ALMS1</i>    | -6.88535 | 0.083003 |
| <i>SWSAP1</i>   | -5.97119 | 0.083003 |
| <i>FKRP</i>     | -8.35022 | 0.08437  |
| <i>R3HCC1L</i>  | 2.100275 | 0.08437  |
| <i>ATP6V0A2</i> | 7.516466 | 0.08437  |
| <i>CTBS</i>     | -1.09325 | 0.087422 |
| <i>NDUFB6</i>   | -3.81527 | 0.089149 |
| <i>LRRC23</i>   | -5.83882 | 0.089727 |
| <i>ZNF783</i>   | -6.36604 | 0.090674 |
| <i>PITPNM2</i>  | 6.753539 | 0.090674 |
| <i>ZKSCAN8</i>  | -5.38335 | 0.091456 |
| <i>METTL14</i>  | 2.749343 | 0.091456 |
| <i>OTUD3</i>    | -6.22913 | 0.091697 |
| <i>DHX34</i>    | 1.527793 | 0.091697 |
| <i>SCML4</i>    | -6.22987 | 0.092404 |
| <i>TEX10</i>    | -6.5709  | 0.093276 |
| <i>POLR2I</i>   | 2.046113 | 0.093276 |
| <i>DOLPP1</i>   | -7.00696 | 0.093542 |
| <i>TTN-AS1</i>  | -6.5789  | 0.093542 |
| <i>C2orf74</i>  | -6.56888 | 0.093542 |
| <i>PGBD4</i>    | -6.13542 | 0.093542 |
| <i>ARL1</i>     | -6.6038  | 0.093861 |
| <i>IFFO1</i>    | -1.02322 | 0.093861 |

MVK

-5.10257

0.098213

---

**Supplementary Table 6. Differentially expressed genes between classical monocytes at D0 and D7 from patients with NDB.**

| <b>Gene symbol</b> | <b>Fold change (log2)</b> | <b>Adjusted P-value</b> |
|--------------------|---------------------------|-------------------------|
| <i>LENG8-AS1</i>   | 5.251524                  | 0.000328                |
| <i>HILPDA</i>      | 5.970084                  | 0.000328                |
| <i>BACH2</i>       | 8.747973                  | 0.000328                |
| <i>AUTS2</i>       | 8.199014                  | 0.001022                |
| <i>ANK3</i>        | 6.961462                  | 0.001173                |
| <i>ABCB10</i>      | 6.369108                  | 0.001383                |
| <i>SH2D2A</i>      | 8.104254                  | 0.001383                |
| <i>ECI2</i>        | -6.212                    | 0.001632                |
| <i>GAN</i>         | 7.662459                  | 0.001632                |
| <i>FLNC</i>        | -7.65071                  | 0.002206                |
| <i>ZNF33B</i>      | 4.891705                  | 0.003604                |
| <i>HBA1</i>        | 4.906643                  | 0.003604                |
| <i>BRCA2</i>       | -1.66141                  | 0.004981                |
| <i>FLVCR1</i>      | 2.899743                  | 0.006672                |
| <i>TMOD2</i>       | -3.41111                  | 0.010306                |
| <i>RASGRP1</i>     | 8.396223                  | 0.010306                |
| <i>C12orf76</i>    | 6.661049                  | 0.012457                |
| <i>FCHO2</i>       | -1.29215                  | 0.016538                |
| <i>DDX47</i>       | 2.412834                  | 0.023613                |
| <i>AURKA</i>       | -5.54322                  | 0.028536                |
| <i>TLCD2</i>       | 3.338249                  | 0.033656                |
| <i>HBM</i>         | 6.67833                   | 0.037397                |
| <i>ASH1L-AS1</i>   | 6.487424                  | 0.043458                |
| <i>KLRB1</i>       | 6.28643                   | 0.04978                 |
| <i>SURF2</i>       | 7.479731                  | 0.04978                 |
| <i>BTBD19</i>      | -7.00011                  | 0.050557                |
| <i>UBA7</i>        | -1.5818                   | 0.050557                |
| <i>SLED1</i>       | 6.38034                   | 0.050557                |

|                   |          |          |
|-------------------|----------|----------|
| <i>CRIPAK</i>     | 7.322236 | 0.050557 |
| <i>TC2N</i>       | 7.612699 | 0.050557 |
| <i>S1PR5</i>      | 6.000998 | 0.050601 |
| <i>TGFB2</i>      | 5.554031 | 0.051016 |
| <i>ABLIM1</i>     | 7.536741 | 0.053538 |
| <i>HBB</i>        | 3.820448 | 0.061888 |
| <i>MYEOV</i>      | 6.736616 | 0.069488 |
| <i>BISPR</i>      | 5.129274 | 0.071118 |
| <i>MAP3K15</i>    | -7.55429 | 0.078589 |
| <i>POLD3</i>      | -1.30429 | 0.084276 |
| <i>CLEC5A</i>     | -2.50951 | 0.090888 |
| <i>FAM184B</i>    | 6.906187 | 0.090888 |
| <i>PHF13</i>      | 7.597289 | 0.090888 |
| <i>PAXIP1-AS1</i> | 5.76484  | 0.093594 |
| <i>CDC42BPA</i>   | 4.539569 | 0.097316 |
| <i>SLC6A8</i>     | 5.227147 | 0.097316 |
| <i>INSIG2</i>     | 6.441514 | 0.097316 |

---

**Supplementary Table 7. Univariate and multivariate analyses of clinical characteristics and peripheral blood biomarkers in association with progression-free survival.**

| Characteristics              | Category  | Univariate             |       | Multivariate           |       |
|------------------------------|-----------|------------------------|-------|------------------------|-------|
|                              |           | HR<br>(95% CI)         | P     | HR<br>(95% CI)         | P     |
| Age (years)                  | < 60      | 1                      |       | -                      |       |
|                              | ≥ 60      | 1.104<br>(0.587-2.073) | 0.759 |                        |       |
| Sex                          | Male      | 1                      |       | -                      |       |
|                              | Female    | 1.296<br>(0.566-2.972) | 0.540 |                        |       |
| Performance status           | ECOG 0    | 1                      |       | 1                      |       |
|                              | ECOG 1-2  | 1.935<br>(0.748-5.001) | 0.173 | 1.742<br>(0.651-4.661) | 0.269 |
| Child-Pugh score             | 5-6       | 1                      |       | -                      |       |
|                              | 7-9       | 1.492<br>(0.748-2.978) | 0.257 |                        |       |
| Etiology                     | Viral     | 1                      |       | -                      |       |
|                              | Non-viral | 0.975<br>(0.401-2.371) | 0.956 |                        |       |
| Lymph node metastasis        | No        | 1                      |       | -                      |       |
|                              | Yes       | 1.163<br>(0.602-2.245) | 0.654 |                        |       |
| Number of involved sites     | 1-3       | 1                      |       | 1                      |       |
|                              | ≥4        | 2.202<br>(0.888-5.457) | 0.088 | 1.655<br>(0.589-4.651) | 0.340 |
| Major vessel invasion        | Absent    | 1                      |       | -                      |       |
|                              | Present   | 1.080<br>(0.574-2.034) | 0.811 |                        |       |
| Alpha-fetoprotein<br>(ng/mL) | < 400     | 1                      |       | -                      |       |



|                                |          |                        |       |                        |       |
|--------------------------------|----------|------------------------|-------|------------------------|-------|
|                                | ≥ 400    | 1.236<br>(0.637-2.400) | 0.531 |                        |       |
| PIVKA-II (mAU/mL)              | < 2500   | 1                      | -     |                        |       |
|                                | ≥ 2500   | 0.654<br>(0.327-1.309) | 0.231 |                        |       |
| Neutrophil-to-lymphocyte ratio | < 3.3    | 1                      | -     |                        |       |
|                                | ≥ 3.3    | 1.018<br>(0.542-1.912) | 0.957 |                        |       |
| Monocyte-to-lymphocyte ratio   | < 0.5    | 1                      | -     |                        |       |
|                                | ≥ 0.5    | 1.064<br>(0.555-2.042) | 0.851 |                        |       |
| Monocyte index                 | < 1      | 1                      | 1     |                        |       |
|                                | ≥ 1      | 0.345<br>(0.158-0.753) | 0.008 | 0.367<br>(0.164-0.820) | 0.015 |
| Previous locoregional therapy  | Not done | 1                      | 1     |                        |       |
|                                | Done     | 0.557<br>(0.241-1.285) | 0.170 | 0.600<br>(0.241-1.495) | 0.273 |
| Response to sorafenib          | PR/SD    | 1                      | -     |                        |       |
|                                | PD       | 1.194<br>(0.626-2.280) | 0.590 |                        |       |

Abbreviations: HR, hazard ratio; CI, confidence interval; ECOG, Eastern Cooperative Oncology Group; PR, partial response; SD, stable disease; PD, progressive disease.

**Supplementary Table 8. Univariate and multivariate analyses of clinical characteristics and peripheral blood biomarkers in association with overall survival.**

| Characteristics              | Category  | Univariate              |       | Multivariate             |       |
|------------------------------|-----------|-------------------------|-------|--------------------------|-------|
|                              |           | HR<br>(95% CI)          | P     | HR<br>(95% CI)           | P     |
| Age (years)                  | < 60      | 1                       |       | 1                        |       |
|                              | ≥ 60      | 0.574<br>(0.273-1.208)  | 0.144 | 1.388<br>(0.439-4.388)   | 0.576 |
| Sex                          | Male      | 1                       |       | -                        |       |
|                              | Female    | 1.432<br>(0.540-3.798)  | 0.470 |                          |       |
| Performance status           | ECOG 0    | 1                       |       | 1                        |       |
|                              | ECOG 1-2  | 5.019<br>(1.173-21.470) | 0.030 | 11.613<br>(1.714-78.668) | 0.012 |
| Child-Pugh score             | 5-6       | 1                       |       | 1                        |       |
|                              | 7-9       | 2.640<br>(1.183-5.893)  | 0.018 | 0.518<br>(0.124-2.161)   | 0.366 |
| Etiology                     | Viral     | 1                       |       | -                        |       |
|                              | Non-viral | 0.942<br>(0.359-2.474)  | 0.903 |                          |       |
| Lymph node metastasis        | No        | 1                       |       | -                        |       |
|                              | Yes       | 1.333<br>(0.616-2.884)  | 0.465 |                          |       |
| Number of involved sites     | 1-3       | 1                       |       | 1                        |       |
|                              | ≥4        | 2.642<br>(0.974-7.164)  | 0.056 | 9.013<br>(1.504-54.020)  | 0.016 |
| Major vessel invasion        | Absent    | 1                       |       | 1                        |       |
|                              | Present   | 1.895<br>(0.877-4.096)  | 0.104 | 1.765<br>(0.539-5.775)   | 0.348 |
| Alpha-fetoprotein<br>(ng/mL) | < 400     | 1                       |       | -                        |       |

|                                |          |                        |       |                        |       |
|--------------------------------|----------|------------------------|-------|------------------------|-------|
|                                | ≥ 400    | 1.244<br>(0.590-2.626) | 0.566 |                        |       |
| PIVKA-II (mAU/mL)              | < 2500   | 1                      | -     |                        |       |
|                                | ≥ 2500   | 1.320<br>(0.621-2.808) | 0.471 |                        |       |
| Neutrophil-to-lymphocyte ratio | < 3.3    | 1                      | -     |                        |       |
|                                | ≥ 3.3    | 1.144<br>(0.557-2.351) | 0.713 |                        |       |
| Monocyte-to-lymphocyte ratio   | < 0.5    | 1                      | -     |                        |       |
|                                | ≥ 0.5    | 1.310<br>(0.621-2.765) | 0.478 |                        |       |
| Monocyte index                 | < 1      | 1                      | 1     |                        |       |
|                                | ≥ 1      | 0.476<br>(0.207-1.091) | 0.079 | 0.319<br>(0.115-0.886) | 0.028 |
| Previous locoregional therapy  | Not done | 1                      | 1     |                        |       |
|                                | Done     | 0.300<br>(0.124-0.727) | 0.007 | 0.093<br>(0.023-0.386) | 0.001 |
| Response to sorafenib          | PR/SD    | 1                      | 1     |                        |       |
|                                | PD       | 1.789<br>(0.849-3.771) | 0.126 | 2.204<br>(0.845-5.751) | 0.106 |

Abbreviations: HR, hazard ratio; CI, confidence interval; ECOG, Eastern Cooperative Oncology Group; PR, partial response; SD, stable disease; PD, progressive disease.
